1 **Mycobacterial OtsA structures unveil substrate preference mechanism and**  
2 **allosteric regulation by 2-oxoglutarate and 2-phosphoglycerate**

3

4

5 **Vítor Mendes<sup>1\*</sup>, Marta Acebrón-García-de-Eulate<sup>1</sup>, Nupur Verma<sup>1</sup>, Michal**  
6 **Blaszczyk<sup>1</sup>, Márcio V. B. Dias<sup>2,3</sup> and Tom L. Blundell<sup>1\*</sup>**

7

8 1 - Department of Biochemistry, University of Cambridge, Cambridge CB21GA, UK.

9 2 - Department of Microbiology, Institute of Biomedical Science, University of São  
10 Paulo, São Paulo, Brazil.

11 3 – Department of Chemistry, University of Warwick, Coventry CV4 7EQ, UK.

12 \*Corresponding authors

13 Tom L. Blundell

14 Address: Department of Biochemistry, University of Cambridge, 80 Tennis Court Road,  
15 CB2 1GA Cambridge, UK.

16 Phone: +441223333628

17 Email: tom@cryst.bioc.cam.ac.uk

18 Vitor Mendes

19 Address: Department of Biochemistry, University of Cambridge, 80 Tennis Court Road,  
20 CB2 1GA Cambridge, UK.

21 Phone: +441223766028

22 Email: vgm23@cam.ac.uk

23

24

25

26

27 **Abstract**

28 Trehalose is an essential disaccharide for mycobacteria and a key constituent of several  
29 cell wall glycolipids with fundamental roles in pathogenesis. Mycobacteria possess two  
30 pathways for trehalose biosynthesis. However, only the OtsAB pathway was found to be  
31 essential in *M. tuberculosis*, with marked growth and virulence defects of OtsA mutants  
32 and strict essentiality of OtsB2. Herein, we report the first mycobacterial OtsA structures  
33 from *M. thermoresistibile* in both apo and ligand-bound forms. Structural information  
34 reveals three key residues in the mechanism of substrate preference that were further  
35 confirmed by site-directed mutagenesis. Additionally, we identify 2-oxoglutarate and 2-  
36 phosphoglycerate as allosteric regulators of OtsA. The structural analysis in this work  
37 strongly contributed to define the mechanisms for feedback inhibition, show different  
38 conformational states of the enzyme and map a new allosteric site.

39

40

41

42

43

44

45

46

47

48

49

50

## 51 **Introduction**

52

53 Trehalose is a non-reducing disaccharide, formed by  $\alpha$ -(1-1) linked glucoses, with a wide  
54 distribution in nature and present in all three domains of life (1). This remarkably  
55 widespread sugar performs multiple roles in a wide variety of organisms and it can also  
56 fulfil different roles within the same organism. Trehalose has been considered a  
57 compatible solute, conferring protection to proteins, DNA, membranes and whole cells  
58 from thermal shock, osmotic shock, freezing, ionizing radiation, oxidative stress and  
59 desiccation (1-9). This disaccharide, which can further function as a carbon and energy  
60 reserve molecule (1, 10-12), was also recently related to pathogenicity of *Pseudomonas*  
61 *aeruginosa* in plants (13). It additionally plays fundamental signaling roles in plants in  
62 the phosphorylated form (trehalose-6-phosphate) where it regulates sucrose metabolism  
63 and flowering (1, 14-16) and in yeast where it regulates gluconeogenesis and glycolysis  
64 (17, 18). Trehalose was further shown to be an autophagy inducer, both in plants and in  
65 mammals, with potential biotechnological and clinical implications (19, 20).

66 In mycobacteria, trehalose is also an essential component of mycolic acids and other cell  
67 wall glycolipids, which are major protagonists in *Mycobacterium tuberculosis*  
68 pathogenesis (1), the causative agent of the widespread infectious disease tuberculosis. In  
69 these organisms, trehalose was further identified as a key signaling molecule of cell-  
70 envelope stress playing a role as an activator of the iniBAC operon, which is induced  
71 when mycobacteria are exposed to the first line drug isoniazid (21).

72 All mycobacterial species, with a few exceptions, possess two pathways to synthesize  
73 trehalose, the OtsAB and the TreYZ pathway (1). The OtsAB pathway is the most widely  
74 distributed trehalose biosynthesis pathway, present in bacteria, archaea and eukaryotes  
75 (22, 23). In this pathway, which is conserved and essential in mycobacteria, trehalose is

76 synthesized in a two-step process involving OtsA and OtsB2 enzymes. *M. tuberculosis*  
77 mutants showed that the OtsAB pathway was not only the dominant route for trehalose  
78 biosynthesis in this pathogen but also required for growth both *in vitro* and in a mouse  
79 infection model, with marked growth and virulence defects of OtsA mutants (24) and  
80 strict essentiality of OtsB2 due to the toxic effect of trehalose-6-phosphate (T6P)  
81 accumulation (24, 25).

82 OtsA, a glycosyltransferase that belongs to the GT20 family of the CAZY classification  
83 ([www.cazy.org](http://www.cazy.org)), uses the  $\alpha$  anomer of glucose-6-phosphate (G6P) as acceptor and NDP-  
84 glucose as the donor to synthesize T6P, with net retention of the anomeric configuration  
85 of the donor substrate (26, 27). Interestingly, OtsAs from different organisms show  
86 different donor preferences as shown by kinetic studies and X-ray crystal structures, but  
87 the reasons behind these preferences are poorly understood (27-32). Recently, different  
88 roles were identified for OtsA beyond its enzymatic activity. OtsA was reported to act as  
89 an osmotic stress sensor and morphogenetic protein that can regulate the switch to  
90 myceloid growth in *Arthrobacter sp.* strain A3, a pleomorphic soil dwelling  
91 actinobacteria (33).

92 In this work we have purified, crystallized and solved the structure of *Mycobacterium*  
93 *thermoresistibile* OtsA (*MtrOtsA*). To gain further insight into mycobacterial OtsA, we  
94 have obtained structures with substrates, product and pathway product that offer insight  
95 for mechanisms of ADP-glucose preference and feedback inhibition by trehalose. We  
96 further performed structure-guided point mutations of key residues of the active site and  
97 characterized the mutants showing that three mutations are enough to change the donor  
98 substrate preference to UDP-glucose. Importantly with these structures, we have also  
99 identified a new allosteric site and novel allosteric regulators of this enzyme that link  
100 glycolytic and TCA cycle metabolites to the regulation of trehalose synthesis.

101 **Results**

102

103 **Overall structure**

104 The structure of *MtrOtsA* in apo form was solved by molecular replacement, using *E. coli*  
105 OtsA structure (PDB code: 1UQU) as the search model. Data collection and refinement  
106 statistics are summarized in (Table S1). *MtrOtsA* is composed of two Rossmann-fold  
107 domains with a deep catalytic site at their interface, in an arrangement typical of GT-B  
108 glycosyltransferases as described previously for other organisms (27-29). The apo protein  
109 crystallized in the  $I4_122$  space group, with one protomer per asymmetric unit, and  
110 diffracted to  $\sim 1.8$  Å resolution. The N-terminal domain is formed by a core of 7 parallel  
111  $\beta$ -strands flanked on both sides by an antiparallel  $\beta$ -strand and surrounded by 8  $\alpha$ -helixes,  
112 one of which is composed of the final C-terminal residues (Fig. 1A). The C-terminal  
113 domain contains 6 parallel  $\beta$ -strands associated with 9  $\alpha$ -helixes with the last one  
114 undergoing a kink and extending to the N-terminal domain, characteristic of the GT-B  
115 fold glycosyltransferases (Fig 1A). Analysis of the B-factor distribution shows that the  
116 N-terminal domain has the highest values for atomic temperature factors, suggesting that  
117 this domain is more dynamic, which is consistent with the large movements of  $\alpha$ -1 during  
118 catalytic activity.

119 *MtrOtsA* forms a tetramer in solution, as previously observed for *M. tuberculosis* OtsA.  
120 This tetrameric form is also observed in all the crystal structures reported herein (Fig 1B).  
121 The amino acids involved in the tetramer interfaces are not conserved beyond  
122 mycobacteria and related species (Fig S1), suggesting that OtsA might have a different  
123 molecular assembly in different species. Indeed in *Escherichia coli* both tetrameric and  
124 dimeric forms were reported (27) and in *Streptomyces venezuelae*, *Aspergillus fumigatus*  
125 and *Candida albicans* only the dimeric form was observed (28, 29). However, in

126 mycobacteria and closely related organisms the tetramer interfaces are highly conserved,  
127 suggesting a tetrameric assembly of OtsA in all of these organisms (Supplementary Fig  
128 S1).

129

### 130 **Catalytic site**

131 OtsA, is a glycosyltransferase that uses the  $\alpha$  anomer of G6P as acceptor and NDP-  
132 glucose as the donor to synthesize T6P. The *Mtr*OtsA catalytic site is located between the  
133 two Rossmann-fold domains in a large and deep cavity. Structures with donor substrates  
134 were determined by soaking the apo form crystals with ADP-glucose and GDP-glucose  
135 (Fig 2). The donor substrates interact primarily with the C-terminal domain through the  
136 side chains of the highly conserved Arg286, Lys 291, Asp385, Glu393 and with the side  
137 chain of Arg365 (Fig 2), which is conserved in all mycobacteria and closely related  
138 species but less conserved outside this group (Fig S1). Backbone interactions with the  
139 absolutely conserved residues Gly386, Met387 and Leu389 amine groups are also  
140 observed. N-terminal domain interactions with the donor substrate are only observed for  
141 His168 when the active site is in an open conformation (Fig 2). To obtain a structure with  
142 the acceptor substrate, we co-crystallized OtsA in the presence of 5 mM ADP and G6P.  
143 As G6P binds to the protein in the presence of a donor substrate or its nucleotide, the  
144 active site adopts to a closed conformation (Fig 3A). The OtsA:ADP:G6P ternary  
145 complex crystallized in the P6<sub>2</sub>22 space group, with one protomer per asymmetric unit,  
146 and the crystals diffracted up to ~1.7 Å resolution. In this closed conformation new  
147 interactions with the donor substrate are formed with the side chain of Thr42 and the  
148 Gly39 peptide-NH function (Fig 3). Due to the absolute conserved nature of Gly39 and  
149 the contact it forms with the glucose-bound phosphate, this residue is highly likely to be  
150 mechanistically involved in the catalytic activity (27).

151 The acceptor substrate interacts with the highly conserved residues Arg18, Tyr90,  
152 Asp144 and Gln146 of the N-terminal domain and with only a single residue of the C-  
153 terminal domain, Arg324 (Fig 3B). The residues involved in acceptor substrate  
154 interaction are highly conserved in all species (Fig S1). As described for *E. coli* OtsA  
155 (27), the OtsA:ADP:G6P ternary structure shows the catalytic site in a closed  
156 conformation that substantially differs from the apo form, with  $\alpha$ -helix 1 and the Arg35-  
157 Gly39 loop region moving up to  $\sim 12$  Å (Fig 3A).

158

### 159 **Properties of *M. thermoresistibile* OtsA.**

160 *Mtr*OtsA uses ADP-glucose, UDP-glucose and GDP-glucose as glucose donors with  
161 decreasing efficiency (Table 1) and G6P as the only acceptor, in accordance to what was  
162 reported before for *M. tuberculosis* OtsA (32, 34). The kinetic parameters for *Mtr*OtsA  
163 were obtained and are reported in (Table 1) and (Fig. S2) with  $K_m$  values for preferred  
164 donor substrate (ADP-Glucose) of  $0.25 \pm 0.02$  mM and for the acceptor (G6P) of  $3.3 \pm$   
165  $0.1$  mM. The  $K_m$  for GDP-glucose of  $0.29 \pm 0.02$  mM was in the same range as the one  
166 obtained for ADP-glucose, however the turnover was 5 fold lower (Table 1). For UDP-  
167 glucose, the enzyme showed a  $\sim 7$  fold higher  $K_m$  of  $1.7 \pm 0.1$  mM than the one obtained  
168 for ADP-glucose (Table 1).

169 The preference of ADP-glucose over the other glucose donors was further confirmed by  
170 isothermal titration calorimetry (ITC). The binding affinity of substrate donors could only  
171 be determined for ADP-glucose in the tested conditions with an observable  $K_d$  of  $27.17 \pm$   
172  $2.66$   $\mu$ M (Fig S3). Other glucose donors analysed (GDP-glucose and UDP-glucose) had  
173 no observable heat of binding and the same was observed for G6P. The lack of heat of  
174 binding for GDP- and UDP-glucose is most likely due to their reduced affinity. For G6P  
175 case, it reflects a necessity of previous binding of the donor substrate.

176

177 **Donor substrate preference is largely mediated by three residues**

178 OtsAs from different organisms have been shown to have different donor substrate  
179 preferences, while being capable of using several nucleotide donors (29, 32, 35, 36),  
180 which is reflected in lower conservation of the donor substrate interacting residues (Fig  
181 S1). Preference for ADP-glucose as the donor substrate in *Mtr*OtsA is conferred by  
182 interactions with the deeply buried adenine moiety (Fig 4A). The carbonyl groups of  
183 Leu319 and Arg361 interact with the primary amine, and the amide group of Val363  
184 interacts with N1 of the adenine moiety (Fig 4A). A highly coordinated water is also  
185 interacting with the primary amine of the adenine moiety and the carbonyl groups of  
186 Ala320, Leu359 and Arg361. The guanine moiety of GDP-glucose cannot occupy the  
187 same deeply buried pocket as the adenine because its primary amine group would  
188 sterically clash with Val363 carbonyl group (Fig 4B). It thus binds to OtsA more weakly  
189 than ADP-glucose explaining the substrate preference and consequently the lack of  
190 observable heat of binding in the tested ITC conditions. A binary complex structure with  
191 OtsA and UDP-glucose was also obtained but the electron density was only observed for  
192 glucose and the two phosphates (not shown) indicating a reduced preference for this  
193 substrate as confirmed by enzymatic and biophysical data. Comparing mycobacterial  
194 OtsAs with *E. coli*, we hypothesised that the ADP preference was mediated by the  
195 substitution of an isoleucine (Ile295 in *E. coli*) for a leucine (Leu319 in *M.*  
196 *thermoresistibile*) that allows the primary amine of the adenine moiety to occupy a buried  
197 position interacting with the carbonyl group of Leu319 (Fig 4C) that no other nucleotide  
198 activated donor can occupy. However, given the residue differences between the two  
199 enzymes it is likely that other residues could also play a role. To improve the selection of  
200 residues to mutate we employed a computational approach by using a mCSM-lig (37), a



201 software developed by our group that predicts the effects of mutations on binding affinity.  
202 The software predicted several that residues within 4.5 Å of the adenine moiety have a  
203 destabilizing effect on the interaction with the ligand if mutated to the *E. coli* OtsA  
204 equivalent (Table S2). Combining this information with structural analysis we selected  
205 three mutations predicted to be destabilizing; Val363Phe, Leu319Ile and Glu367Leu, the  
206 latter being a long distance mutation that we hypothesised would have a strong effect on  
207 ligand binding.

208 To confirm our hypothesis, we generated several *Mtr*OtsA mutants (Leu319Ile,  
209 Val363Phe, Leu319Ile-Glu367Leu and a triple mutant) and we obtained kinetic  
210 properties for all of them (Table 1). As we predicted the mutant Leu319Ile showed a ~3  
211 fold increase in the  $K_m$  for ADP-glucose whereas,  $K_m$  was similar for GDP-glucose and  
212 UDP-glucose when compared to the wild type. Even though GDP-glucose now showed  
213 the best  $K_m$  among the three different donors, the catalytic efficiency and turnover rate  
214 was still higher for ADP-glucose (Table 1). A complete reversal of the donor substrate  
215 preference for UDP-glucose was obtained only with a combination of the three mutations  
216 (Table 1). The triple mutant showed a ~5 fold increase in ADP-glucose  $K_m$  and a reduction  
217 for the UDP-glucose  $K_m$  by more than 3 fold (Table 1). The catalytic efficiency was also  
218 completely reversed for ADP- and UDP-glucose between the wild-type and the triple  
219 mutant (Table 1). Although Leu319Ile showed the largest contribution for ADP-glucose  
220  $K_m$  increase, Val363Phe and Glu367Leu were also determinant for the reversal to UDP-  
221 Glucose preference (Table 1). This can be explained by the fact that the phenylalanine  
222 substitution at position 363 forces the loop between  $\beta$ -14 and  $\alpha$ -14 to move towards the  
223 nucleotide binding site (Fig 4C), thus establishing stronger interactions with a pyrimidine  
224 nucleotide and clashing with purine ones. This effect is also observed for both ADP- and  
225 GDP-glucose, with a ~2.5 fold increase in  $K_m$  when compared to the wild type. The

226 leucine substitution at position 367 further helps in this move since the hydrogen bonds  
227 between the side chains of Arg266 and Glu367 are no longer present and  $\alpha$ -14 is repelled  
228 from Arg266 due to the Leu side chain (Fig 4C).

229

### 230 **Feedback inhibition**

231 We soaked both trehalose and T6P into apo OtsA crystals and solved structures with both  
232 ligands (Fig 4D and 4E). In both structures OtsA active site assumes an open  
233 conformation and two compounds superpose almost perfectly at active site, recapitulating  
234 all of the interactions for the donor glucose and also interacting with His199 and Arg286,  
235 the latter a residue that interacts with the phosphates of the donor substrate (Fig 4D and  
236 4E). The structure with T6P further shows the phosphate group of the product occupying  
237 a similar position to the phosphate group of G6P, interacting with the side chains of  
238 Tyr90, Gln146, Arg324 and Tyr145 a residue that does not interact with G6P (Fig 4E).  
239 Interestingly the buffer present in the crystallization condition (CHES) is observed in both  
240 trehalose and trehalose-6-phosphate bound structures, occupying the site of the nucleotide  
241 donor with the sulphate group binding in a phosphate site and interacting with hydroxyl  
242 groups from both glucose units of trehalose (Fig 4D and 4E).

243 After obtaining these structures, it was expected to observe some degree of feedback  
244 inhibition of OtsA by both trehalose and T6P. Both trehalose-6-phosphate and trehalose  
245 inhibited the enzyme, but the effect of trehalose was more pronounced with ~40%  
246 inhibition at 10 mM while for trehalose-6-phosphate a maximum inhibition of ~25% was  
247 reached at the same concentration (Fig S4). These results show that under physiological  
248 conditions OtsA is regulated by trehalose, the final product of the pathway which is highly  
249 abundant inside mycobacterial cells, but not by T6P which could not be detected in *M.*  
250 *tuberculosis* cell extracts under physiological conditions (25).

251

252 **Identification of an allosteric site in *M. thermoresistible* OtsA**

253 Trehalose is a multipurpose molecule that is abundant in mycobacteria. It can function  
254 not only as an energy reserve and as structural component of cell wall glycolipids, but  
255 can also lead to the synthesis of glycogen through the TreS-Mak-GlgE pathway and be  
256 directly synthesised from glycogen from the TreX-TreY-TreZ pathway. It is therefore  
257 likely that trehalose synthesis through the OtsA-B pathway is under strong regulation.

258 In all the crystallization conditions that contained CHES, we could observe this  
259 compound in the crystal structures occupying a pocket formed by the contact interface of  
260 2 OtsA protomers in the tetrameric assembly (Fig 5). The CHES sulphate group directly  
261 interacts with the side chains of Arg384 of protomer A and Arg213 of protomer B,  
262 forming hydrogen bonds with both, but also hydrophobic hydrogen- $\pi$  interactions with  
263 Phe410 of protomer A (Fig 5). The residues composing this site are completely conserved  
264 in mycobacterial and closely related species that are likely to harbour OtsA tetramers but  
265 not on others species known to have other oligomeric forms (Fig S1).

266 Arg384 sits in a loop that forms extensive contacts with the donor substrate through  
267 Asp385, Gly386, Met387 and Leu389 (Fig 2). Ligands interacting with the side chain of  
268 Arg384 could therefore have an impact on the activity of the enzyme making this site a  
269 prime candidate for allosteric regulation.

270 While CHES had no discernible impact on OtsA activity in the tested concentrations, it  
271 was reported before that F6P acted as an allosteric regulator of *M. tuberculosis* OtsA (34),  
272 and the same was reported for yeast OtsA-B complex (38). We have tested *Mtr*OtsA in  
273 the same conditions as those reported by Diez and colleagues (34), and could not detect  
274 any effect of F6P for *Mtr*OtsA. Although we did not observe any effect of F6P on enzyme  
275 activity for *Mtr*OtsAs, we nevertheless attempted to soak this compound in both apo form

276 and OtsA:ADP:G6P ternary complex crystals, and also co-crystallize it in the presence  
277 and absence of ADP and G6P, all in CHES free conditions. None of these conditions  
278 provided a structure in which F6P occupied an allosteric site. We could however observe  
279 F6P when co-crystallized together with ADP, bound to the acceptor substrate site, with  
280 OtsA presenting the active site in a closed conformation (Fig S5).

281 OtsA was found to interact with a multitude of proteins in a large-scale proteomics study  
282 (39), including enolase that catalyses the penultimate step of glycolysis. In our search for  
283 an allosteric regulator we, therefore, decided to test several glycolytic metabolites  
284 glucose-1-phosphate (G1P), fructose-1,6-biphosphate (F16BP), 3-phosphoglycerate  
285 (3PG), the enolase substrate 2-phosphoglyceric acid (2PG) and product  
286 phosphoenolpyruvate (PEP), but also the master metabolic regulators cAMP and 2-  
287 oxoglutarate (2OG) (40), and assess their impact in OtsA activity.

288 From the several compounds tested only 2OG and 2PG showed clear inhibition of OtsA  
289 activity with  $IC_{50}$  of 1.8 mM and 2.3 mM respectively (Table 2) and (Fig 5C). To assess  
290 whether they could be acting allosterically on *MtrOtsA* and binding to the site identified  
291 by CHES we performed two mutations on the arginines that interacted with CHES  
292 (Arg213Glu and Arg384Glu) and tested the two mutants activity in the presence of 2OG  
293 and 2PG. The results show that the Arg213Glu mutation abolished the strong response of  
294 the protein to 2OG while there was a ~5 fold increase in 2PG  $IC_{50}$  to 12 mM. For the  
295 Arg384Glu mutant 2OG becomes unexpectedly becomes a strong activator with an  $EC_{50}$   
296 of 0.7 mM while 2PG has no effect (Table 2).

297

## 298 **Discussion**

299 Trehalose, an essential disaccharide in mycobacteria, is one of the critical components of  
300 the cell wall. The OtsA-B pathway is an essential source of trehalose for these organisms

301 with knockouts of this pathway being growth defective or non-viable (24, 25). Here we  
302 reveal the first mycobacterial OtsA structure. The overall structure of *M. thermoresistibile*  
303 OtsA is similar to the reported structures of *E. coli*, *S. venezuelae* and *Paraburkholderia*  
304 *xenovorans* OtsAs despite relatively low sequence identity (30-35%). Remarkably, OtsAs  
305 have also a highly similar fold to the pseudo-glycosyltransferases VldE and ValL  
306 involved in validamycin A synthesis, a potent antifungal agent (41, 42).  
307 Nevertheless, there are substantial differences in the oligomeric organization of bacterial  
308 OtsAs, with tetrameric, dimeric and protomeric forms reported. While mycobacteria and  
309 related species present conservation of interfaces showing that the observed tetrameric  
310 form for *Mtr*OtsA is present in all these organisms, beyond this group such conservation  
311 is absent, which is consistent with other oligomeric states (Figure S1).  
312 The structures obtained in this work allow us to explain how mycobacterial OtsA  
313 preference for ADP-glucose, is conferred by Leu319 which creates a cavity to  
314 accommodate the primary amine of the adenine moiety allowing it to interact with Leu319  
315 and Arg361 carbonyl groups. It is further mediated by Val363 carbonyl group that does  
316 not allow GDP-glucose to occupy the same position and Glu367. Mutating these three  
317 residues to the *E. coli* OtsA equivalents completely changed the preference to UDP-  
318 glucose, the preferred *E. coli* OtsA donor substrate. Both Leu319 and Glu367 are highly  
319 conserved in all mycobacterial and closely related species analysed but not beyond this  
320 group, while Val363 can be replaced by other small hydrophobic amino acids such as  
321 alanine and isoleucine in other mycobacterial species and closely related species (Figure  
322 S1). However, outside this group Val363 is replaced by bulkier residues such as tyrosine  
323 and phenylalanine (Figure S1). These differences are suggestive of alternative donor  
324 substrate preferences for organisms outside the sub-order *Corynebacterineae*.

325 Trehalose is not only abundant inside the mycobacterial cell but also involved in a cycle  
326 that links it to the synthesis and degradation of glycogen (43). We have shown that OtsA  
327 is feedback inhibited by trehalose but not by T6P even though the structures obtained  
328 show that both compounds form extensive interactions with OtsA. However, given that  
329 these two structures were obtained by soaking apo form crystals with high concentrations  
330 of trehalose and T6P, and that CHES is also observed at the active site interacting with  
331 both compounds, it is possible that these two structures do not entirely reflect their natural  
332 interactions with the enzyme. The toxic accumulation of T6P in OtsB2 knockout mutants  
333 (25) can be explained by these results since OtsA shows very low sensitivity to T6P.  
334 Furthermore trehalose levels are reduced in the mutant (25) further contributing to an  
335 increase in OtsA activity leading to higher T6P production.

336 Regulation of OtsA by phosphorylation and methylation has been observed for yeast  
337 trehalose-6-phosphate synthase complex (44, 45) and phosphorylation of *E. coli* OtsA has  
338 also been reported (46) in two residues close to the active site. Even though only one of  
339 the residues is conserved in mycobacteria (Ser323 for *Mtr*OtsA), phosphorylation of this  
340 residue would most likely lead to inactivation of the enzyme due to the location close to  
341 the acceptor binding site (Fig S6). Interestingly this residue is highly conserved in all  
342 sequences analysed with a single exception where it is substituted by a threonine (Figure  
343 S1), suggesting that phosphorylation of this residue might be a common regulatory  
344 mechanism of OtsA activity.

345 Allosteric regulation was reported for both *M. tuberculosis* OtsA and yeast trehalose  
346 phosphate synthase complex, mediated by F6P (34, 38). The structure obtained with F6P  
347 shows this compound occupying the donor site, in the presence of ADP, with the enzyme  
348 adopting a closed conformation. Nevertheless, OtsA could only use G6P as an acceptor  
349 and F6P showed no effect in the enzyme activity, indicating that the presence of F6P in

350 the acceptor site was forced by the high concentration used for co-crystallization (5mM).  
351 The observed differences in regulation by F6P between mycobacterial enzymes are  
352 difficult to reconcile since the allosteric site is highly conserved in mycobacterial OtsAs  
353 and closely related species (Fig S1).  
354 *Mtr*OtsA is allosteric regulated by 2PG, the substrate of enolase, a glycolytic enzyme,  
355 and 2OG a master metabolic regulator that sits at the interface of carbon and nitrogen  
356 metabolism. The observed effect is within relevant physiological concentrations for both  
357 compounds (47, 48).  
358 The effect of 2PG on OtsA and the reported interaction with enolase suggests an interplay  
359 between these two enzymes that would be interesting to explore further on the enolase  
360 side. Enolase is a multifunctional protein involved in a variety of cellular processes,  
361 beyond its enzymatic activity, that include response to oxidative and thermal stress (49),  
362 and is further involved in the RNA degradosome activity, by regulating RNA stability in  
363 response to stress (50, 51). Given that trehalose is a known chemical chaperone and  
364 compatible solute (1), the association between enolase and OtsA, through the effect of  
365 2PG in OtsA activity and the reported interaction between the two enzymes, points to  
366 further regulation to stress response that would be interesting to explore further on the  
367 enolase side.  
368 2OG is a molecule that sits at the interface of carbon and nitrogen metabolism and that  
369 has been shown to regulate many different pathways (40). The role of trehalose as an  
370 energy reserve molecule (1) and its relationship with synthesis and degradation of  
371 glycogen (52) points to a mechanism in which 2OG influences the synthesis of these two  
372 compounds through regulation of OtsA activity that deserves to be further explored.  
373 We have shown that OtsA can be allosteric inhibited, however a single mutation at the  
374 allosteric site changed the behaviour of 2OG, but not 2PG, from an inhibitor to an

375 activator. This hints at the possible existence of allosteric activators of OtsA to be  
376 discovered.

377 The conservation of allosteric site residues and oligomeric assembly in the sub-order  
378 *Corynebacterineae* but not outside, suggests that allosteric regulation of OtsA through  
379 this site might be limited to this group of organisms. The results of this work are a  
380 significant step forward in understanding the regulation of trehalose synthesis in  
381 mycobacteria the structural reasons behind substrate preference, and provide new  
382 important insight into this enzyme.

383

## 384 **Methods**

385

### 386 **Bacterial strains and cloning.**

387 *M. thermoresistibile* (DSM 44167) *otsA* gene was amplified from chromosomal DNA  
388 obtained from the Deutsch Sammlung von Mikroorganismen und Zellkulturen GmbH  
389 (DSMZ, Braunschweig, Germany). Primers were designed based on the sequence  
390 available in NCBI database and the gene was cloned between the BamHI and HindIII  
391 sites in pET28a vector (Novagen), modified with an N-terminal 6xHis-SUMO tag. The  
392 resulting plasmid was confirmed by DNA sequencing and transformed into *E. coli*  
393 BL21(DE3) strain (Invitrogen). Six *MtrOtsA* mutants (Arg213Glu, Leu319Ile,  
394 Val363Phe, Arg384Glu, Leu319Ile-Glu367Leu and Leu319Ile-Val363Phe-Glu367Leu)  
395 were also constructed by site-specific mutagenesis, sequenced and transformed into *E.*  
396 *coli* BL21(DE3) strain. Primers used in this work are listed in table S3.

397

### 398 **Recombinant expression and protein purification**



399 Transformed *E. coli* BL21(DE3) cells were grown to mid-exponential growth phase  
400 ( $OD_{610} = 0.6$ ) in LB media (Invitrogen) containing 30 mg L<sup>-1</sup> kanamycin at 37 °C.  
401 Isopropyl β-D-1-thiogalactopyranoside (IPTG) was then added at a final concentration  
402 of 0.5 mM to induce gene expression and the temperature was lowered to 18 °C. Cells  
403 were harvested 18 h-20 h later by centrifugation and re-suspended in 20 mM TRIS pH  
404 7.5, 500 mM NaCl and 20 mM Imidazole with protease inhibitor tablets (Roche), DNaseI  
405 and 5 mM MgCl<sub>2</sub>. Cells were lysed by sonication and cell lysate was centrifuged at 27000  
406 g for 30 min to remove cell debris.

407 Recombinant *MtrOtsA* was purified with a HiTrap IMAC Sepharose FF column (GE-  
408 Healthcare), equilibrated with 20 mM TRIS pH 7.5, 500 mM NaCl and 20 mM Imidazole.  
409 Elution was performed in the same buffer, but with 500 mM Imidazole. Imidazole was  
410 removed with a desalting column and SUMO tag was cleaved overnight at 4 °C by adding  
411 Ulp1 protease at 1:100 ratio in 20 mM TRIS pH 7.5, 500 mM NaCl. SUMO tag, Ulp1  
412 protease and uncleaved SUMO-OtsA were removed with a HiTrap IMAC Sepharose FF  
413 column (GE-Healthcare), equilibrated with 20 mM TRIS pH 7.5, 500 mM NaCl and 20  
414 mM imidazole. Flow through containing OtsA was collected, concentrated and loaded to  
415 a Superdex 200 column equilibrated with 20 mM TRIS pH 7.5, 500 mM NaCl. Fraction  
416 purity was determined by SDS-page and purest fractions were pooled concentrated to ~10  
417 mg.ml<sup>-1</sup> in 20 mM TRIS pH 7.5 350 mM NaCl, flash frozen in liquid nitrogen and stored  
418 at -80 °C. The same purification protocol was used for all *MtrOtsA* mutants.

419

#### 420 **Crystallization and data collection**

421 *MtrOtsA* crystallization screens and optimization were performed at 18 °C using sitting-  
422 drop vapour diffusion method. 300 nl of pure OtsA at 10 mg.ml<sup>-1</sup> was mixed in 1:1 ratio  
423 with well solution using a Phoenix robot (Art Robbins). Initial conditions were obtained

424 in classics suite crystallization screen (Qiagen), solution 36. Crystals obtained in this  
425 condition diffracted only up to 3 Å. Therefore, further optimization was performed using  
426 the additive screen HT (Hampton Research) and ethylene glycol was found to be the best  
427 additive. The final optimized condition consisted of 0.7 M sodium potassium tartrate, 0.1  
428 M CHES pH 10 and 10% v/v ethylene glycol. Crystals appeared after 4 days in this  
429 condition. To obtain ligand-bound structures soaking was performed in the optimized  
430 condition using the hanging drop vapour diffusion method as follows: 1 µl of protein  
431 storage buffer containing 5 mM of ligand was mixed with 1 µl of reservoir solution and  
432 drops were left to equilibrate against 500 µl of reservoir solution for 3 days. Crystals were  
433 then transferred to the pre-equilibrated drops and incubated for 24h. A cryogenic solution  
434 was prepared by adding ethylene glycol up to 25% v/v to mother liquor. Crystals were  
435 briefly transferred to this solution, flash frozen in liquid nitrogen and stored for data  
436 collection. To obtain an ADP-G6P-OtsA ternary complex co-crystallization with 5mM  
437 ADP and G6P was performed instead, as all attempts to soak G6P alone or G6P in the  
438 presence of ADP have failed. Crystals were obtained in the Wizard Classic I&II screen  
439 (Rigaku), solution E10 and were flash frozen in liquid nitrogen after a brief soak in a  
440 solution containing mother liquor and 25% ethylene glycol. The same condition was used  
441 to obtain ADP:F6P:OtsA complex.

442 All data sets were collected at stations I04, I04-1 and I24 at Diamond Light Source  
443 (Oxford, UK). Data collection and refinement statistics are summarized in (Table S1).

444

#### 445 **Structure solution and refinement**

446 Diffraction data were processed and reduced using MOSFLM (53) and Aimless (54) from  
447 the CCP4 suite (55), or autoPROC from Global Phasing Limited (56). The apo form  
448 crystallized in I4<sub>1</sub>22 space group with one protomer per asymmetric unit. ADP-G6P-OtsA

449 ternary complex crystallized in P6<sub>2</sub>22 space group again with one protomer per  
450 asymmetric unit.

451 Initial phases were determined with PHASER (57) from PHENIX software package (58)  
452 using the structure of *E. coli* OtsA (PDB entry 1UQU) (31) as a search model. Model  
453 building was done with Coot (59) and refinement was performed in PHENIX (58).  
454 Structure validation was performed using Coot and PHENIX tools (58, 59). All the figures  
455 were prepared with Pymol (<http://www.pymol.org>).

456

#### 457 **Prediction of mutations in ligand affinity**

458 To provide an insight on which residues to mutate, we used mCSM-lig a software that  
459 predicts the effect of mutations in ligand affinity (37) on the X-ray crystal structure of  
460 OtsA with ADP-glucose (5JIO).

461

#### 462 **Enzymatic Assays**

463 Formation of T6P was assessed by a continuous colorimetric assay that followed the  
464 release of NDP by measuring the oxidation of NADH at 340nm, in the presence of  
465 pyruvate kinase and lactate dehydrogenase. All reagents used were obtained from Sigma-  
466 Aldrich. The enzymatic reactions (200  $\mu$ l) were performed at 37 °C and contained 50 mM  
467 TRIS pH 7.5, 200 mM NaCl, 10 mM MgCl<sub>2</sub>, 50 mM KCl, 0.3 mM NADH, 2.5 mM  
468 phosphoenolpyruvate (PEP), 10 units of pyruvate kinase/lactate dehydrogenase, 0.1  $\mu$ M  
469 enzyme and varying concentrations of G6P and NDP-glucose to determine kinetic  
470 parameters.

471 The effect of trehalose and T6P as feedback inhibitors, and G1P, F6P, F16BP, CHES,  
472 2PG, 3PG, cAMP and 2OG as allosteric regulators, was tested in the conditions described  
473 above but with fixed concentrations of G6P and ADP-glucose (both 0.3 mM). The same

474 conditions were used to test possible allosteric regulators for wild type OtsA and mutants  
475 Arg213Glu and Arg384Glu. All experiments were performed in triplicate in a PheraStar  
476 plate reader (BMG Labtech) and data was analysed with Prism 5 (Graphpad Software).  
477 To assess the inhibitory effect of ADP and allosteric effect of phosphoenolpyruvate an  
478 end-point assay was performed instead. Reactions (100  $\mu$ l) containing 50 mM TRIS pH  
479 7.5, 200 mM NaCl, 10 mM MgCl<sub>2</sub>, 50 mM KCl, 4  $\mu$ M *Mtr*OtsA, 0.3 mM ADP-glucose,  
480 0.3 mM G6P and varying concentrations of ADP and PEP were incubated at 37 °C and  
481 stopped at different time points with 10  $\mu$ l of 1 M HCl, incubated for 1 minute and  
482 neutralized with NaOH. The reactions were diluted with 100  $\mu$ l acetonitrile and run at 25  
483 °C on a Waters I-class UHPLC with a PDA detector (258 nm) using a ACQUITY UHPLC  
484 BEH Amide column (2.1 x 100 mm, 1.7  $\mu$ m). Gradient elution (delivered at 0.13 mL/min)  
485 was employed using 80/20 acrilamide/water with 0.1 % NH<sub>2</sub>OH (A) and water with 0.1  
486 % NH<sub>2</sub>OH (B) which started at 90 % A and decreased linearly to 55 % A over 10 min.

487

#### 488 **Isothermal Titration Calorimetry**

489 Binding interaction between OtsA and ligands was characterized at 25 °C, using a  
490 Microcal ITC200 titration calorimeter (Microcal). OtsA concentration of 60  $\mu$ M was used  
491 for all titrations. Ligands (1 mM) were injected in 2 $\mu$ l aliquots. Titration data was  
492 recorded in 20mM TRIS pH 7.5, 500mM NaCl. Data was analysed by fitting a simple  
493 single-site model using Origin software (Microcal).

494

495

496

497

498

499

500

501

## 502 **References**

503

- 504 1. Nobre A, Alarico S, Maranhã A, Mendes V, & Empadinhas N (2014) The molecular biology  
505 of mycobacterial trehalose in the quest for advanced tuberculosis therapies.  
506 *Microbiology* 160(Pt 8):1547-1570.
- 507 2. Iturriaga G, Suarez R, & Nova-Franco B (2009) Trehalose metabolism: from  
508 osmoprotection to signaling. *Int J Mol Sci* 10(9):3793-3810.
- 509 3. Webb KM & DiRuggiero J (2012) Role of Mn<sup>2+</sup> and compatible solutes in the radiation  
510 resistance of thermophilic bacteria and archaea. *Archaea* 2012:845756.
- 511 4. Singer MA & Lindquist S (1998) Thermotolerance in *Saccharomyces cerevisiae*: the Yin  
512 and Yang of trehalose. *Trends Biotechnol* 16(11):460-468.
- 513 5. Lu H, *et al.* (2011) Lack of trehalose accelerates H<sub>2</sub>O<sub>2</sub>-induced *Candida albicans*  
514 apoptosis through regulating Ca<sup>2+</sup> signaling pathway and caspase activity. *PLoS ONE*  
515 6(1):e15808.
- 516 6. Lee J, *et al.* (2013) Trehalose Glycopolymers as Excipients for Protein Stabilization.  
517 *Biomacromolecules* 14(8):2561-2569.
- 518 7. Kandror O, DeLeon A, & Goldberg AL (2002) Trehalose synthesis is induced upon  
519 exposure of *Escherichia coli* to cold and is essential for viability at low temperatures.  
520 *Proceedings of the National Academy of Sciences of the United States of America*  
521 99(15):9727-9732.
- 522 8. Cardoso FS, Castro RF, Borges N, & Santos H (2007) Biochemical and genetic  
523 characterization of the pathways for trehalose metabolism in *Propionibacterium*  
524 *freudenreichii*, and their role in stress response. *Microbiology* 153(Pt 1):270-280.
- 525 9. Tapia H & Koshland DE (2014) Trehalose is a versatile and long-lived chaperone for  
526 desiccation tolerance. *Current biology : CB* 24(23):2758-2766.
- 527 10. Thevelein JM (1984) Regulation of trehalose mobilization in fungi. *Microbiol Rev*  
528 48(1):42-59.
- 529 11. Elbein AD (1974) The metabolism of alpha, alpha-trehalose. *Advances in carbohydrate*  
530 *chemistry and biochemistry* 30:227-256.
- 531 12. Elbein AD, Pan YT, Pastuszak I, & Carroll D (2003) New insights on trehalose: a  
532 multifunctional molecule. *Glycobiology* 13(4):17R-27R.
- 533 13. Djonovic S, *et al.* (2013) Trehalose biosynthesis promotes *Pseudomonas aeruginosa*  
534 pathogenicity in plants. *PLoS Pathog* 9(3):e1003217.
- 535 14. Wahl V, *et al.* (2013) Regulation of flowering by trehalose-6-phosphate signaling in  
536 *Arabidopsis thaliana*. *Science* 339(6120):704-707.
- 537 15. O'Hara LE, Paul MJ, & Winkler A (2013) How do sugars regulate plant growth and  
538 development? New insight into the role of trehalose-6-phosphate. *Molecular plant*  
539 6(2):261-274.
- 540 16. Paul MJ, Primavesi LF, Jhurrea D, & Zhang Y (2008) Trehalose metabolism and signaling.  
541 *Annu Rev Plant Biol* 59:417-441.
- 542 17. Fraenkel D & Nielsen J (2016) Trehalose-6-phosphate synthase and stabilization of yeast  
543 glycolysis. *FEMS Yeast Res* 16(1):fov100.

- 544 18. Deroover S, Ghillebert R, Broeckx T, Winderickx J, & Rolland F (2016) Trehalose-6-  
545 phosphate synthesis controls yeast gluconeogenesis downstream and independent of  
546 SNF1. *FEMS Yeast Res* 16(4).
- 547 19. Williams B, *et al.* (2015) Trehalose Accumulation Triggers Autophagy during Plant  
548 Desiccation. *PLoS genetics* 11(12):e1005705.
- 549 20. Rubinsztein DC, Bento CF, & Deretic V (2015) Therapeutic targeting of autophagy in  
550 neurodegenerative and infectious diseases. *J Exp Med* 212(7):979-990.
- 551 21. Boot M, *et al.* (2017) Cell envelope stress in mycobacteria is regulated by the novel signal  
552 transduction ATPase IniR in response to trehalose. *PLoS genetics* 13(12):e1007131.
- 553 22. Avonce N, Mendoza-Vargas A, Morett E, & Iturriaga G (2006) Insights on the evolution  
554 of trehalose biosynthesis. *BMC Evol Biol* 6:109.
- 555 23. Zaparty M, *et al.* (2013) The first prokaryotic trehalose synthase complex identified in  
556 the hyperthermophilic crenarchaeon *Thermoproteus tenax*. *PLoS ONE* 8(4):e61354.
- 557 24. Murphy HN, *et al.* (2005) The OtsAB pathway is essential for trehalose biosynthesis in  
558 *Mycobacterium tuberculosis*. *J Biol Chem* 280(15):14524-14529.
- 559 25. Korte J, *et al.* (2016) Trehalose-6-Phosphate-Mediated Toxicity Determines Essentiality  
560 of OtsB2 in *Mycobacterium tuberculosis* In Vitro and in Mice. *PLoS Pathog*  
561 12(12):e1006043.
- 562 26. Errey JC, *et al.* (2010) Mechanistic insight into enzymatic glycosyl transfer with retention  
563 of configuration through analysis of glycomimetic inhibitors. *Angew Chem Int Ed Engl*  
564 49(7):1234-1237.
- 565 27. Gibson RP, Turkenburg JP, Charnock SJ, Lloyd R, & Davies GJ (2002) Insights into  
566 trehalose synthesis provided by the structure of the retaining glucosyltransferase OtsA.  
567 *Chem Biol* 9(12):1337-1346.
- 568 28. Miao Y, *et al.* (2017) Structural and In Vivo Studies on Trehalose-6-Phosphate Synthase  
569 from Pathogenic Fungi Provide Insights into Its Catalytic Mechanism, Biological  
570 Necessity, and Potential for Novel Antifungal Drug Design. *MBio* 8(4).
- 571 29. Asencion Diez MD, *et al.* (2017) The Production and Utilization of GDP-glucose in the  
572 Biosynthesis of Trehalose 6-Phosphate by *Streptomyces venezuelae*. *J Biol Chem*  
573 292(3):945-954.
- 574 30. Jiang Y, *et al.* (2010) The catalytic efficiency of trehalose-6-phosphate synthase is  
575 effected by the N-loop at low temperatures. *Arch Microbiol* 192(11):937-943.
- 576 31. Gibson RP, Tarling CA, Roberts S, Withers SG, & Davies GJ (2004) The donor subsite of  
577 trehalose-6-phosphate synthase: binary complexes with UDP-glucose and UDP-2-deoxy-  
578 2-fluoro-glucose at 2 Å resolution. *J Biol Chem* 279(3):1950-1955.
- 579 32. Pan YT, Carroll JD, & Elbein AD (2002) Trehalose-phosphate synthase of *Mycobacterium*  
580 *tuberculosis*. Cloning, expression and properties of the recombinant enzyme. *Eur J*  
581 *Biochem* 269(24):6091-6100.
- 582 33. Chen X, *et al.* (2017) A trehalose biosynthetic enzyme doubles as an osmotic stress  
583 sensor to regulate bacterial morphogenesis. *PLoS genetics* 13(10):e1007062.
- 584 34. Asencion Diez MD, *et al.* (2015) Allosteric regulation of the partitioning of glucose-1-  
585 phosphate between glycogen and trehalose biosynthesis in *Mycobacterium*  
586 *tuberculosis*. *Biochim Biophys Acta* 1850(1):13-21.
- 587 35. Killick KA (1979) Trehalose 6-phosphate synthase from *Dictyostelium discoideum*:  
588 partial purification and characterization of the enzyme from young sorocarps. *Arch*  
589 *Biochem Biophys* 196(1):121-133.
- 590 36. Silva Z, Alarico S, & da Costa MS (2005) Trehalose biosynthesis in *Thermus thermophilus*  
591 RQ-1: biochemical properties of the trehalose-6-phosphate synthase and trehalose-6-  
592 phosphate phosphatase. *Extremophiles* 9(1):29-36.
- 593 37. Pires DE, Blundell TL, & Ascher DB (2016) mCSM-lig: quantifying the effects of mutations  
594 on protein-small molecule affinity in genetic disease and emergence of drug resistance.  
595 *Sci Rep* 6:29575.

- 596 38. Londesborough J & Vuorio OE (1993) Purification of trehalose synthase from baker's  
597 yeast. Its temperature-dependent activation by fructose 6-phosphate and inhibition by  
598 phosphate. *Eur J Biochem* 216(3):841-848.
- 599 39. Hu P, *et al.* (2009) Global functional atlas of Escherichia coli encompassing previously  
600 uncharacterized proteins. *PLoS biology* 7(4):e96.
- 601 40. Huergo LF & Dixon R (2015) The Emergence of 2-Oxoglutarate as a Master Regulator  
602 Metabolite. *Microbiol Mol Biol Rev* 79(4):419-435.
- 603 41. Zheng L, *et al.* (2012) Structural and functional analysis of validoxylamine A 7<sup>1</sup>-phosphate  
604 synthase ValL involved in validamycin A biosynthesis. *PLoS ONE* 7(2):e32033.
- 605 42. Cavalier MC, *et al.* (2012) Mechanistic Insights into Validoxylamine A 7<sup>1</sup>-Phosphate  
606 Synthesis by VldE Using the Structure of the Entire Product Complex. *PLoS ONE* 7(9).
- 607 43. Chandra G, Chater KF, & Bornemann S (2011) Unexpected and widespread connections  
608 between bacterial glycogen and trehalose metabolism. *Microbiology* 157(Pt 6):1565-  
609 1572.
- 610 44. Trevisol ET, Panek AD, De Mesquita JF, & Eleutherio EC (2014) Regulation of the yeast  
611 trehalose-synthase complex by cyclic AMP-dependent phosphorylation. *Biochim*  
612 *Biophys Acta* 1840(6):1646-1650.
- 613 45. Sengupta S, *et al.* (2014) Purification, characterization, sequencing and molecular  
614 cloning of a novel cysteine methyltransferase that regulates trehalose-6-phosphate  
615 synthase from *Saccharomyces cerevisiae*. *Biochim Biophys Acta* 1840(6):1861-1871.
- 616 46. Potel CM, Lin MH, Heck AJR, & Lemeer S (2018) Widespread bacterial protein histidine  
617 phosphorylation revealed by mass spectrometry-based proteomics. *Nat Methods*  
618 15(3):187-190.
- 619 47. Bennett BD, *et al.* (2009) Absolute metabolite concentrations and implied enzyme active  
620 site occupancy in Escherichia coli. *Nat Chem Biol* 5(8):593-599.
- 621 48. Albe KR, Butler MH, & Wright BE (1990) Cellular concentrations of enzymes and their  
622 substrates. *J Theor Biol* 143(2):163-195.
- 623 49. Sharma S, Jadli M, Singh A, Arora K, & Malhotra P (2014) A secretory multifunctional  
624 serine protease, DegP of *Plasmodium falciparum*, plays an important role in thermo-  
625 oxidative stress, parasite growth and development. *FEBS J* 281(6):1679-1699.
- 626 50. Murashko ON & Lin-Chao S (2017) Escherichia coli responds to environmental changes  
627 using enolase degradosomes and stabilized DicF sRNA to alter cellular morphology. *Proc*  
628 *Natl Acad Sci U S A* 114(38):E8025-E8034.
- 629 51. Morita T, Kawamoto H, Mizota T, Inada T, & Aiba H (2004) Enolase in the RNA  
630 degradosome plays a crucial role in the rapid decay of glucose transporter mRNA in the  
631 response to phosphosugar stress in Escherichia coli. *Mol Microbiol* 54(4):1063-1075.
- 632 52. Bornemann S (2016) alpha-Glucan biosynthesis and the GlgE pathway in *Mycobacterium*  
633 *tuberculosis*. *Biochem Soc Trans* 44(1):68-73.
- 634 53. Leslie AGW & Powell HR (2007) Processing diffraction data with MOSFLM. *Nato Sci Ser*  
635 *li Math* 245:41-51.
- 636 54. Evans PR & Murshudov GN (2013) How good are my data and what is the resolution?  
637 *Acta Crystallogr D* 69:1204-1214.
- 638 55. Winn MD, *et al.* (2011) Overview of the CCP4 suite and current developments. *Acta*  
639 *Crystallogr D Biol Crystallogr* 67(Pt 4):235-242.
- 640 56. Vonrhein C, *et al.* (2011) Data processing and analysis with the autoPROC toolbox. *Acta*  
641 *Crystallogr D Biol Crystallogr* 67(Pt 4):293-302.
- 642 57. McCoy AJ, *et al.* (2007) Phaser crystallographic software. *Journal of applied*  
643 *crystallography* 40(Pt 4):658-674.
- 644 58. Adams PD, *et al.* (2010) PHENIX: a comprehensive Python-based system for  
645 macromolecular structure solution. *Acta Crystallogr D Biol Crystallogr* 66(Pt 2):213-221.
- 646 59. Emsley P, Lohkamp B, Scott WG, & Cowtan K (2010) Features and development of Coot.  
647 *Acta Crystallogr D Biol Crystallogr* 66(Pt 4):486-501.

648 60. Jubb HC, *et al.* (2017) Arpeggio: A Web Server for Calculating and Visualising Interatomic  
649 Interactions in Protein Structures. *J Mol Biol* 429(3):365-371.

650

651

652 **Figures**

653

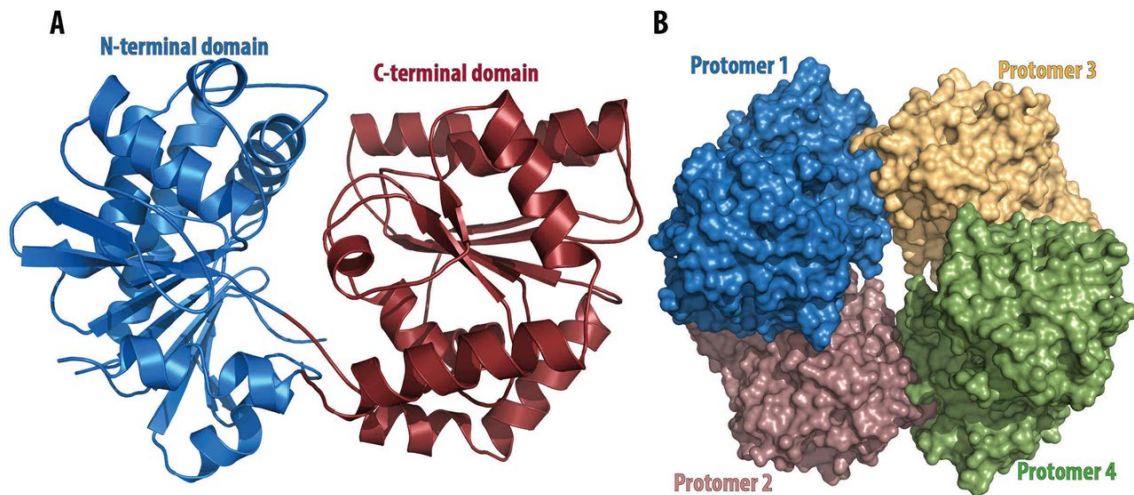

654

655 **Figure 1:** (A) Representation of the overall structure of *M. thermoresistibile* OtsA. The  
656 N-terminal domain consists of residues 1-247 and 462-486, the C-terminal domain of  
657 residues 248-461. View of *M. thermoresistibile* OtsA tetramer (B).

658

659

660



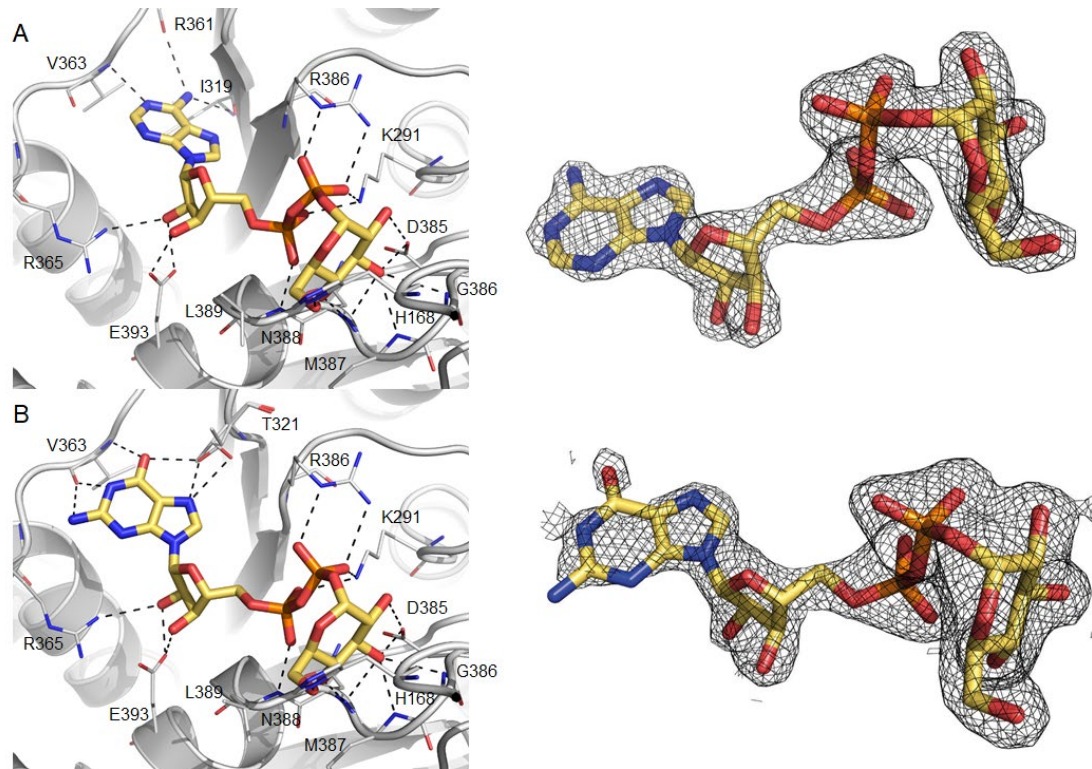

661

662 **Figure 2:** Detailed view of the active site of *M. thermoresistibile* OtsA with ADP-glucose

663 (A) and with GDP-glucose bound (B) with “omit maps” shown. Black dashed lines

664 represent hydrogen bonds.

665

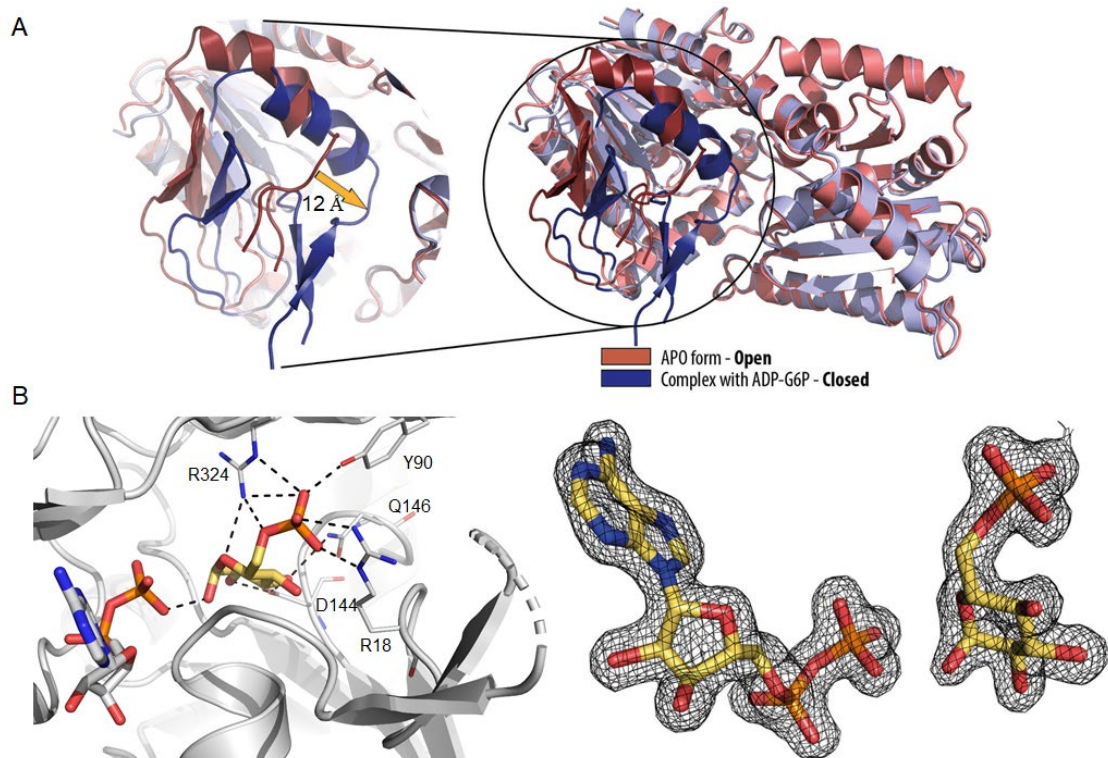

666

667 **Figure 3:** View of OtsA in an open (salmon and red) and closed conformation (violet and  
668 blue) and superposition of the two conformations. (B) Representation of the active site of  
669 *M. thermoresistibile* OtsA with ADP (white) and G6P (yellow) bound with “omit map”  
670 shown. Black dashed lines represent hydrogen bonds.

671

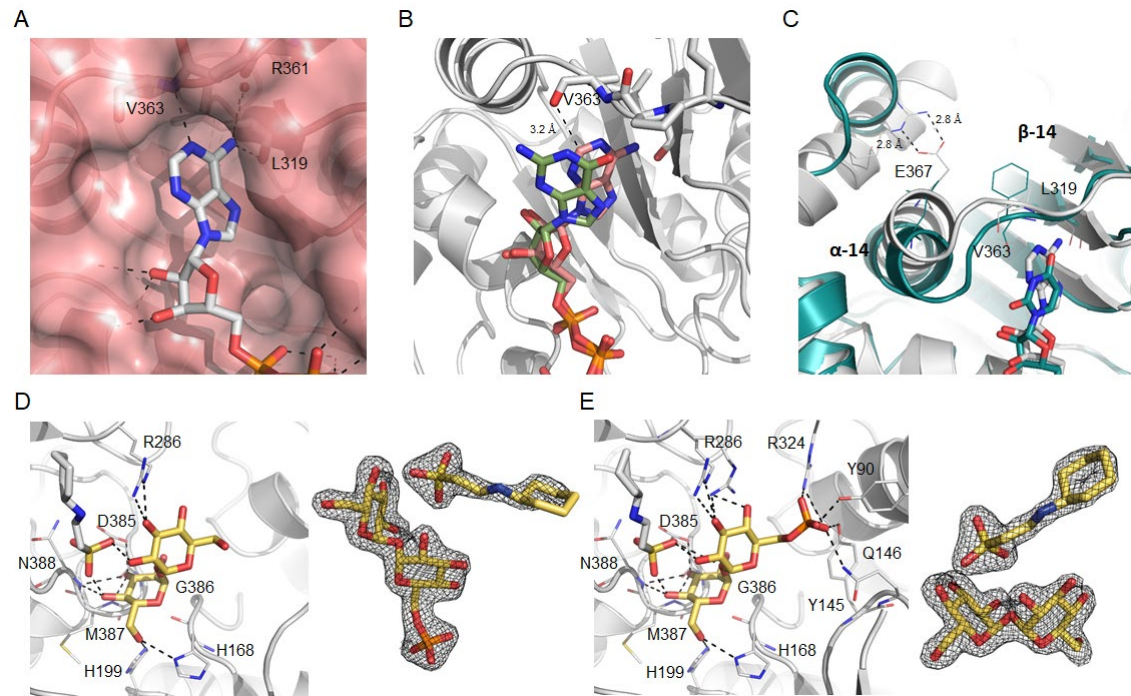

673 **Figure 4:** View of the binding site of the adenine moiety of ADP-glucose (A).  
674 Superposition of ADP-glucose and GDP-glucose structures (B). Superposition of  
675 *MtrOtsA* structure with ADP-glucose bound and *E. coli OtsA* structure with UDP-glucose  
676 bound (PDB code: 1UQU) (C). Alpha helix 14 ( $\alpha$ -14) and beta strand 14 ( $\beta$ -14) are  
677 shown. Detailed view of the active site of *M. thermoresistibile* OtsA with trehalose (D)  
678 and with T6P bound (E) with CHES visible in both structures. “Omit maps” are shown  
679 both trehalose, T6P and CHES. Black dashed lines represent hydrogen bonds.

680

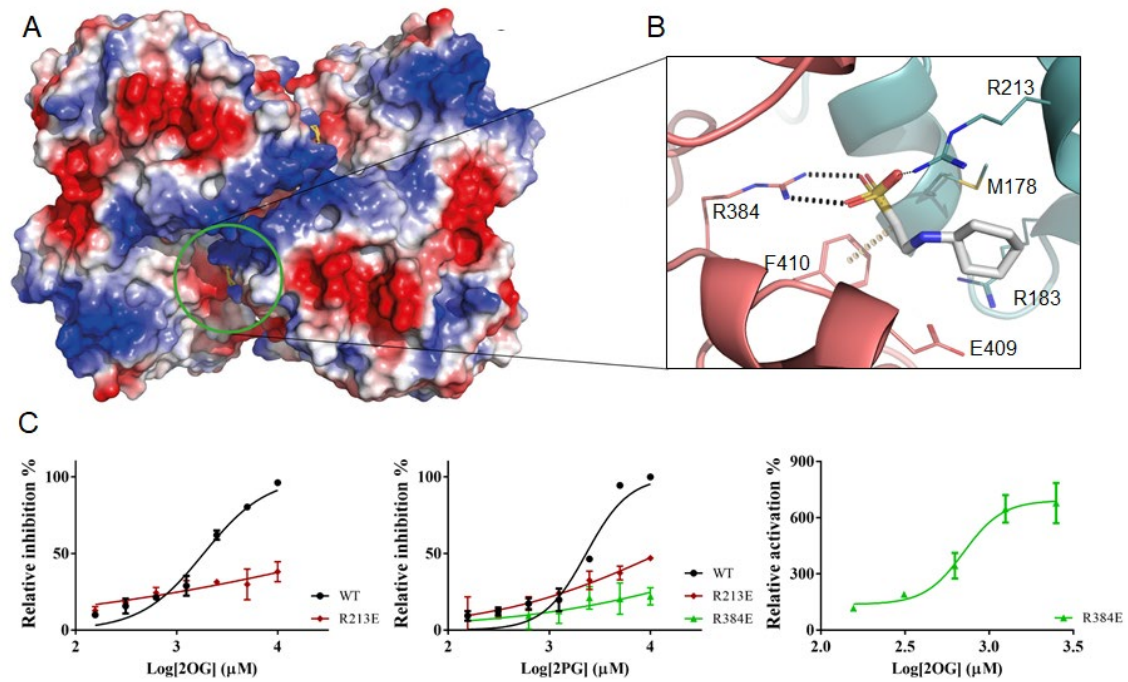

681

682 **Figure 5:** View of the allosteric site of *M. thermoresistibile* OtsA with CHES bound with

683 protein surface electrostatic potential shown (A). Detailed view of the CHES binding site

684 and its interactions with OtsA (B). The interactions were calculated with Arpeggio (60)

685 using the apo structure (5JIJ). Black dots represent hydrogen bonds and yellow disks a

686 carbon- $\pi$  interaction. The two protomers are colored differently. (C) Activity profiles of

687 *M. thermoresistibile* wild type OtsA and the allosteric site mutants Arg213Glu and

688 Arg384Glu in the presence of the allosteric effectors 2OG and 2PG.

689

690

691

692

693

694

695

696

697 **Table 1:** Kinetic parameters of *M. thermoresistibile* OtsA.

698

|                                    | Substrate   | $K_m$<br>(mM) | $k_{cat}$<br>(s <sup>-1</sup> ) | $k_{cat}/K_m$ |
|------------------------------------|-------------|---------------|---------------------------------|---------------|
| <b>WT</b>                          | ADP-Glucose | 0.25 ± 0.02   | 26 ± 1                          | 104 ± 13      |
|                                    | GDP-Glucose | 0.29 ± 0.02   | 5.1 ± 0.2                       | 18 ± 2        |
|                                    | UDP-Glucose | 1.7 ± 0.1     | 36 ± 1                          | 21 ± 2        |
|                                    | Glucose-6P  | 3.3 ± 0.1     | 26 ± 1                          | 7.9 ± 0.5     |
| <b>L319I</b>                       | ADP-Glucose | 0.71 ± 0.18   | 8.4 ± 0.7                       | 12 ± 2        |
|                                    | GDP-Glucose | 0.35 ± 0.04   | 3.1 ± 0.1                       | 8.9 ± 1.4     |
|                                    | UDP-Glucose | 1.4 ± 0.1     | 8.9 ± 0.4                       | 6.4 ± 0.7     |
|                                    | Glucose-6P  | 3.3 ± 0.2     | 6.4 ± 0.2                       | 1.9 ± 0.2     |
| <b>V363F</b>                       | ADP-Glucose | 0.60 ± 0.03   | 11 ± 1                          | 18 ± 2        |
|                                    | GDP-Glucose | 0.74 ± 0.08   | 14 ± 1                          | 19 ± 3        |
|                                    | UDP-Glucose | 0.68 ± 0.06   | 13 ± 1                          | 19 ± 3        |
|                                    | Glucose-6P  | 3.1 ± 0.2     | 19 ± 1                          | 6.1 ± 0.7     |
| <b>L319I,<br/>E367L</b>            | ADP-Glucose | 0.63 ± 0.04   | 14 ± 1                          | 22 ± 3        |
|                                    | GDP-Glucose | 0.70 ± 0.05   | 9.2 ± 0.4                       | 13 ± 2        |
|                                    | UDP-Glucose | 0.63 ± 0.03   | 15 ± 1                          | 24 ± 3        |
|                                    | Glucose-6P  | 3.7 ± 0.2     | 21 ± 1                          | 5.7 ± 0.5     |
| <b>L319I,<br/>V363F,<br/>E367L</b> | ADP-Glucose | 1.3 ± 0.1     | 19 ± 1                          | 15 ± 2        |
|                                    | GDP-Glucose | 0.90 ± 0.06   | 16 ± 1                          | 18 ± 2        |
|                                    | UDP-Glucose | 0.52 ± 0.05   | 22 ± 1                          | 42 ± 6        |
|                                    | Glucose-6P  | 3.2 ± 0.2     | 17 ± 1                          | 5.3 ± 0.6     |
| <b>R213E</b>                       | ADP-Glucose | 0.31 ± 0.01   | 56 ± 2                          | 180 ± 13      |
|                                    | Glucose-6P  | 3.3 ± 0.3     | 33 ± 2                          | 10 ± 1        |
| <b>R384E</b>                       | ADP-Glucose | 1.9 ± 0.2     | 3.2 ± 0.1                       | 1.7 ± 0.2     |
|                                    | Glucose-6P  | 2.9 ± 0.2     | 2.1 ± 0.2                       | 0.77 ± 0.05   |

699

700

701 **Table 2:** Effect of allosteric regulators in *M. thermoresistibile* OtsA activity. Values are  
702 in (mM) and 95% confidence intervals are given in brackets.

|            | WT                                  | R213E                             | R384E                                  |
|------------|-------------------------------------|-----------------------------------|----------------------------------------|
| <b>2OG</b> | IC <sub>50</sub> = 1.8<br>(1.6-2.1) | IC <sub>50</sub> = 73<br>(18-302) | EC <sub>50</sub> = 0.70<br>(0.56-0.88) |
|            | IC <sub>50</sub> = 2.3<br>(2.0-2.7) | IC <sub>50</sub> = 12<br>(6.3-24) | IC <sub>50</sub> < 100                 |

703
